# Supplementary material
Source: publisher figshare collection journal article supplement (https://gsapubs.figshare.com/ndownloader/files/22741007)
Supplement: Supplementary file 1 [file 22741007]

TABLE DR-1. LOCATIONS FOR SAMPLE COLLECTION SITES IN WISCONSIN

| Sample                                                                                                                                                                                                                                                                                                                                                               | Township and range | Locality | Notes                             |
|----------------------------------------------------------------------------------------------------------------------------------------------------------------------------------------------------------------------------------------------------------------------------------------------------------------------------------------------------------------------|--------------------|----------|-----------------------------------|
| <u>St. Peter Sandstone: Wisconsin Arch</u>                                                                                                                                                                                                                                                                                                                           |                    |          |                                   |
| <u>Quartz</u>                                                                                                                                                                                                                                                                                                                                                        |                    |          |                                   |
| WI-SP-1,-2                                                                                                                                                                                                                                                                                                                                                           | Sec. 15-T7N-R7E    | 1        | Road cut, County P                |
| WI-SP-3,-4                                                                                                                                                                                                                                                                                                                                                           | Sec. 18-T10N-R3E   | 2        | Gibraltar Buff                    |
| WI-SP-5,-6                                                                                                                                                                                                                                                                                                                                                           | Sec. 3-T6N-R7E     | 3        | Klevenville Quarry                |
| WI-SP-7                                                                                                                                                                                                                                                                                                                                                              | Sec. 14-T4N-R7E    | 4        | Road cut, Highway 69              |
| WI-SP-10                                                                                                                                                                                                                                                                                                                                                             | Sec. 18-T3N-R8E    | 5        | Road cut, Highway 69              |
| WI-SP-11                                                                                                                                                                                                                                                                                                                                                             | Sec. 5-T1N-R9E     | 6        | Road cut, County OK and Hwy 11/81 |
| <u>Zircons</u>                                                                                                                                                                                                                                                                                                                                                       |                    |          |                                   |
| WI-SP                                                                                                                                                                                                                                                                                                                                                                | Sec. 3-T6N-R7E     | 3        | Klevenville Quarry                |
| <u>Galesville Sandstone: Wisconsin Arch</u>                                                                                                                                                                                                                                                                                                                          |                    |          |                                   |
| <u>Quartz</u>                                                                                                                                                                                                                                                                                                                                                        |                    |          |                                   |
| GALE-D1                                                                                                                                                                                                                                                                                                                                                              | Sec. 20-T13N-R6E   | 7        | Road cut, Highway 94              |
| GALE-D6                                                                                                                                                                                                                                                                                                                                                              | Sec. 9-T13N-R6E    | 8        | Road cut, Highway 12/16           |
| GALE-D4                                                                                                                                                                                                                                                                                                                                                              | Sec. 32-T14N-R6E   | 9        | Road cut, Highway 94              |
| GALE-D2                                                                                                                                                                                                                                                                                                                                                              | Sec. 8-T13N-R6E    | 10       | Road cut, Highway 94              |
| GALE-LR1                                                                                                                                                                                                                                                                                                                                                             | Sec. 19-T8N-R3E    | 11       | Road cut, Highway 130             |
| <u>Zircons</u>                                                                                                                                                                                                                                                                                                                                                       |                    |          |                                   |
| WI-G                                                                                                                                                                                                                                                                                                                                                                 | Sec. 9-T13N-R6E    | 8        | Road cut, Highway 12/16           |
| <p>Note: Localities for St. Peter Sandstone samples are broadly scattered about a ~8,000 km<sup>2</sup> area west and south of Madison, WI. Localities for Galesville Sandstone samples are broadly scattered about a ~5,000 km<sup>2</sup> area west and north of Madison, WI. Samples WI-SP-3 and GALE-D2 also analyzed for REEs and Sm-Nd isotopes (Table 4).</p> |                    |          |                                   |

**TABLE DR-2. LOCATIONS FOR SAMPLE  
COLLECTION SITES IN THE MICHIGAN BASIN**

| Sample                                            | Locality | Core depth (meters) |
|---------------------------------------------------|----------|---------------------|
| <u>Shell Walczak, Bay County, Sec. 7-T14N-R5E</u> |          |                     |
| <u>Quartz</u>                                     | 12       |                     |
| W10944.3                                          |          | 3335.7              |
| W10950.2                                          |          | 3337.5              |
| W10951.3                                          |          | 3337.8              |
| W10951.7                                          |          | 3337.9              |
| W10991.2                                          |          | 3350.0              |
| W11002.9                                          |          | 3353.5              |
| <u>Shell Whyte, Bay County, Sec. 33-T15N-R4E</u>  |          |                     |
| <u>Quartz</u>                                     | 13       |                     |
| SW10985.7                                         |          | 3348.3              |
| SW10994.5                                         |          | 3351.0              |
| SW10999.5                                         |          | 3352.5              |
| SW11000                                           |          | 3352.6              |
| SW11022.5                                         |          | 3359.5              |
| SW11022.5                                         |          | 3359.5              |
| SW11048.5                                         |          | 3367.4              |
| SW11054.4                                         |          | 3369.2              |
| SW11060.1                                         |          | 3371.0              |
| SW11063.4                                         |          | 3372.0              |
| SW11068**                                         |          | 3347.4              |
| <u>Zircon</u>                                     |          |                     |
| MI-SP                                             | 13       | 3370.9-3371.2       |

*Note:* Core samples are taken from two stratigraphic positions in the St. Peter Sandstone, each covering ~20 m intervals in the section (~200 m total thickness in the Michigan Basin).

\*\*sample used for three-step dissolution experiments (Table 3) and REEs and Sm-Nd isotope analysis (Table 4).
